# Supplementary material for: Microparticles mediated cross-talk between tumoral and endothelial cells promote the constitution of a pro-metastatic vascular niche through Arf6 up regulation
Source: PubMed Central journal article supplement (PMC4150875; doi:10.1007/s12307-013-0142-2), 2014-01-15

# Supplementary Figure 6

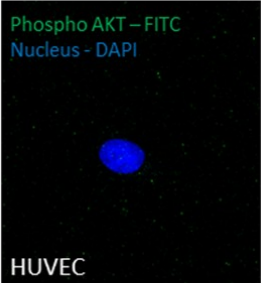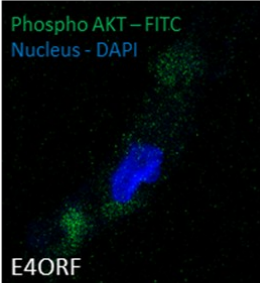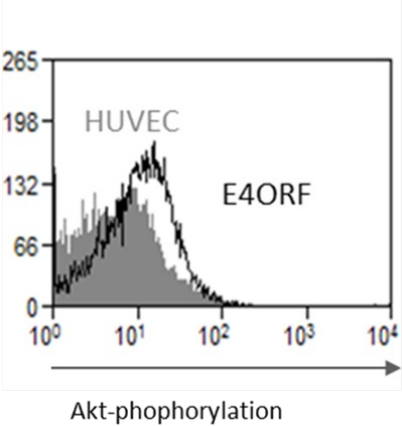

Supplement: 12307_2013_142_MOESM6_ESM.pdf [file 12307_2013_142_MOESM6_ESM.pdf]
