# Supplementary material for: Microparticles mediated cross-talk between tumoral and endothelial cells promote the constitution of a pro-metastatic vascular niche through Arf6 up regulation
Source: Springer Nature journal article supplement (doi:10.1007/s12307-013-0142-2), 2014-01-14

# Supplementary Figure 1

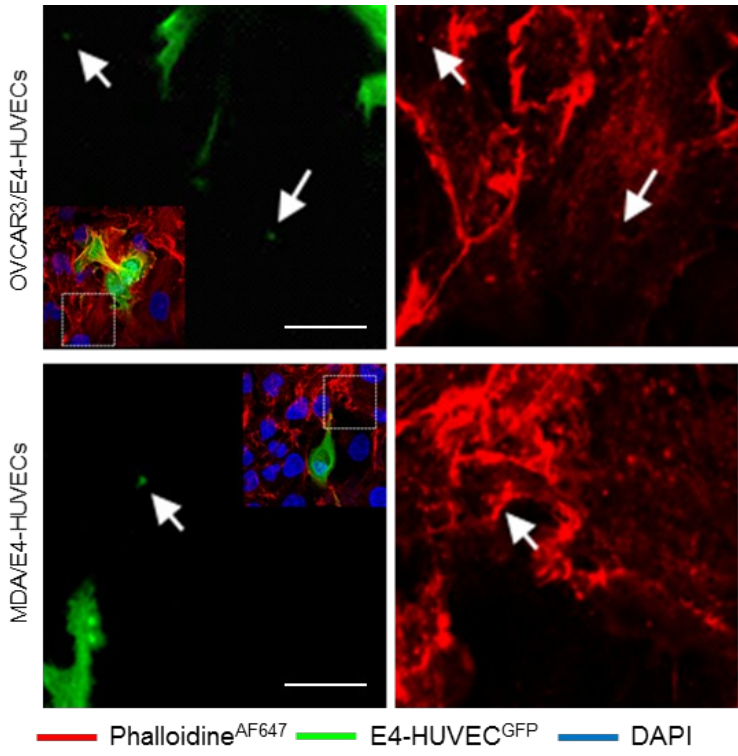

Supplement: MOESM1 [file 9200642]
