# Supplementary material for: Microparticles mediated cross-talk between tumoral and endothelial cells promote the constitution of a pro-metastatic vascular niche through Arf6 up regulation
Source: Springer Nature journal article supplement (doi:10.1007/s12307-013-0142-2), 2014-01-14
Supplement: MOESM5 [file 9200642]

# Supplementary Figure 5

MP-MCF7

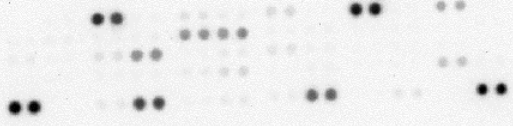

MP-MCF7 treated TGFβ

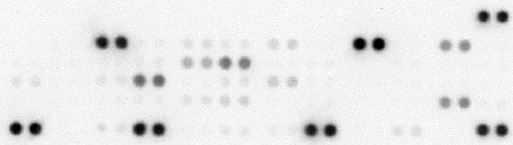

MP-MDA

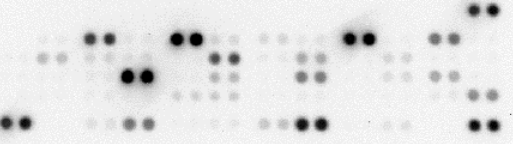

**Inventar & Bestandspunkte**

**PSM**  
Beschreibung der Bestandspunkte

| Inhalt | Verf. Ort | Bestandort | Bestandort |
|--------|-----------|------------|------------|
| 0.0    | 0.0       |            |            |
| 0.1    | 0.1       |            |            |
| 0.2    | 0.2       |            |            |
| 0.3    | 0.3       |            |            |
| 0.4    | 0.4       |            |            |
| 0.5    | 0.5       |            |            |
| 0.6    | 0.6       |            |            |
| 0.7    | 0.7       |            |            |
| 0.8    | 0.8       |            |            |
| 0.9    | 0.9       |            |            |
| 1.0    | 1.0       |            |            |
| 1.1    | 1.1       |            |            |
| 1.2    | 1.2       |            |            |
| 1.3    | 1.3       |            |            |
| 1.4    | 1.4       |            |            |
| 1.5    | 1.5       |            |            |
| 1.6    | 1.6       |            |            |
| 1.7    | 1.7       |            |            |
| 1.8    | 1.8       |            |            |
| 1.9    | 1.9       |            |            |
| 2.0    | 2.0       |            |            |
| 2.1    | 2.1       |            |            |
| 2.2    | 2.2       |            |            |
| 2.3    | 2.3       |            |            |
| 2.4    | 2.4       |            |            |
| 2.5    | 2.5       |            |            |
| 2.6    | 2.6       |            |            |
| 2.7    | 2.7       |            |            |
| 2.8    | 2.8       |            |            |
| 2.9    | 2.9       |            |            |
| 3.0    | 3.0       |            |            |
| 3.1    | 3.1       |            |            |
| 3.2    | 3.2       |            |            |
| 3.3    | 3.3       |            |            |
| 3.4    | 3.4       |            |            |
| 3.5    | 3.5       |            |            |
| 3.6    | 3.6       |            |            |
| 3.7    | 3.7       |            |            |
| 3.8    | 3.8       |            |            |
| 3.9    | 3.9       |            |            |
| 4.0    | 4.0       |            |            |
| 4.1    | 4.1       |            |            |
| 4.2    | 4.2       |            |            |
| 4.3    | 4.3       |            |            |
| 4.4    | 4.4       |            |            |
| 4.5    | 4.5       |            |            |
| 4.6    | 4.6       |            |            |
| 4.7    | 4.7       |            |            |
| 4.8    | 4.8       |            |            |
| 4.9    | 4.9       |            |            |
| 5.0    | 5.0       |            |            |
| 5.1    | 5.1       |            |            |
| 5.2    | 5.2       |            |            |
| 5.3    | 5.3       |            |            |
| 5.4    | 5.4       |            |            |
| 5.5    | 5.5       |            |            |
| 5.6    | 5.6       |            |            |
| 5.7    | 5.7       |            |            |
| 5.8    | 5.8       |            |            |
| 5.9    | 5.9       |            |            |
| 6.0    | 6.0       |            |            |
| 6.1    | 6.1       |            |            |
| 6.2    | 6.2       |            |            |
| 6.3    | 6.3       |            |            |
| 6.4    | 6.4       |            |            |
| 6.5    | 6.5       |            |            |
| 6.6    | 6.6       |            |            |
| 6.7    | 6.7       |            |            |
| 6.8    | 6.8       |            |            |
| 6.9    | 6.9       |            |            |
| 7.0    | 7.0       |            |            |
| 7.1    | 7.1       |            |            |
| 7.2    | 7.2       |            |            |
| 7.3    | 7.3       |            |            |
| 7.4    | 7.4       |            |            |
| 7.5    | 7.5       |            |            |
| 7.6    | 7.6       |            |            |
| 7.7    | 7.7       |            |            |
| 7.8    | 7.8       |            |            |
| 7.9    | 7.9       |            |            |
| 8.0    | 8.0       |            |            |
| 8.1    | 8.1       |            |            |
| 8.2    | 8.2       |            |            |
| 8.3    | 8.3       |            |            |
| 8.4    | 8.4       |            |            |
| 8.5    | 8.5       |            |            |
| 8.6    | 8.6       |            |            |
| 8.7    | 8.7       |            |            |
| 8.8    | 8.8       |            |            |
| 8.9    | 8.9       |            |            |
| 9.0    | 9.0       |            |            |
| 9.1    | 9.1       |            |            |
| 9.2    | 9.2       |            |            |
| 9.3    | 9.3       |            |            |
| 9.4    | 9.4       |            |            |
| 9.5    | 9.5       |            |            |
| 9.6    | 9.6       |            |            |
| 9.7    | 9.7       |            |            |
| 9.8    | 9.8       |            |            |
| 9.9    | 9.9       |            |            |
| 10.0   | 10.0      |            |            |

**Inventar & Bestandspunkte**

**INVENTAR**

| Inhalt | Verf. Ort | Bestandort | Bestandort |
|--------|-----------|------------|------------|
| 0.0    | 0.0       |            |            |
| 0.1    | 0.1       |            |            |
| 0.2    | 0.2       |            |            |
| 0.3    | 0.3       |            |            |
| 0.4    | 0.4       |            |            |
| 0.5    | 0.5       |            |            |
| 0.6    | 0.6       |            |            |
| 0.7    | 0.7       |            |            |
| 0.8    | 0.8       |            |            |
| 0.9    | 0.9       |            |            |
| 1.0    | 1.0       |            |            |
| 1.1    | 1.1       |            |            |
| 1.2    | 1.2       |            |            |
| 1.3    | 1.3       |            |            |
| 1.4    | 1.4       |            |            |
| 1.5    | 1.5       |            |            |
| 1.6    | 1.6       |            |            |
| 1.7    | 1.7       |            |            |
| 1.8    | 1.8       |            |            |
| 1.9    | 1.9       |            |            |
| 2.0    | 2.0       |            |            |
| 2.1    | 2.1       |            |            |
| 2.2    | 2.2       |            |            |
| 2.3    | 2.3       |            |            |
| 2.4    | 2.4       |            |            |
| 2.5    | 2.5       |            |            |
| 2.6    | 2.6       |            |            |
| 2.7    | 2.7       |            |            |
| 2.8    | 2.8       |            |            |
| 2.9    | 2.9       |            |            |
| 3.0    | 3.0       |            |            |
| 3.1    | 3.1       |            |            |
| 3.2    | 3.2       |            |            |
| 3.3    | 3.3       |            |            |
| 3.4    | 3.4       |            |            |
| 3.5    | 3.5       |            |            |
| 3.6    | 3.6       |            |            |
| 3.7    | 3.7       |            |            |
| 3.8    | 3.8       |            |            |
| 3.9    | 3.9       |            |            |
| 4.0    | 4.0       |            |            |
| 4.1    | 4.1       |            |            |
| 4.2    | 4.2       |            |            |
| 4.3    | 4.3       |            |            |
| 4.4    | 4.4       |            |            |
| 4.5    | 4.5       |            |            |
| 4.6    | 4.6       |            |            |
| 4.7    | 4.7       |            |            |
| 4.8    | 4.8       |            |            |
| 4.9    | 4.9       |            |            |
| 5.0    | 5.0       |            |            |
| 5.1    | 5.1       |            |            |
| 5.2    | 5.2       |            |            |
| 5.3    | 5.3       |            |            |
| 5.4    | 5.4       |            |            |
| 5.5    | 5.5       |            |            |
| 5.6    | 5.6       |            |            |
| 5.7    | 5.7       |            |            |
| 5.8    | 5.8       |            |            |
| 5.9    | 5.9       |            |            |
| 6.0    | 6.0       |            |            |
| 6.1    | 6.1       |            |            |
| 6.2    | 6.2       |            |            |
| 6.3    | 6.3       |            |            |
| 6.4    | 6.4       |            |            |
| 6.5    | 6.5       |            |            |
| 6.6    | 6.6       |            |            |
| 6.7    | 6.7       |            |            |
| 6.8    | 6.8       |            |            |
| 6.9    | 6.9       |            |            |
| 7.0    | 7.0       |            |            |
| 7.1    | 7.1       |            |            |
| 7.2    | 7.2       |            |            |
| 7.3    | 7.3       |            |            |
| 7.4    | 7.4       |            |            |
| 7.5    | 7.5       |            |            |
| 7.6    | 7.6       |            |            |
| 7.7    | 7.7       |            |            |
| 7.8    | 7.8       |            |            |
| 7.9    | 7.9       |            |            |
| 8.0    | 8.0       |            |            |
| 8.1    | 8.1       |            |            |
| 8.2    | 8.2       |            |            |
| 8.3    | 8.3       |            |            |
| 8.4    | 8.4       |            |            |
| 8.5    | 8.5       |            |            |
| 8.6    | 8.6       |            |            |
| 8.7    | 8.7       |            |            |
| 8.8    | 8.8       |            |            |
| 8.9    | 8.9       |            |            |
| 9.0    | 9.0       |            |            |
| 9.1    | 9.1       |            |            |
| 9.2    | 9.2       |            |            |
| 9.3    | 9.3       |            |            |
| 9.4    | 9.4       |            |            |
| 9.5    | 9.5       |            |            |
| 9.6    | 9.6       |            |            |
| 9.7    | 9.7       |            |            |
| 9.8    | 9.8       |            |            |
| 9.9    | 9.9       |            |            |
| 10.0   | 10.0      |            |            |

**STARK INDUSTRIES**

**INVENTAR & BESTANDSPUNKTE**

**INHALT**

0.0

0.1

0.2

0.3

0.4

0.5

0.6

0.7

0.8

0.9

1.0

1.1

1.2

1.3

1.4

1.5

1.6

1.7

1.8

1.9

2.0

2.1

2.2

2.3

2.4

2.5

2.6

2.7

2.8

2.9

3.0

3.1

3.2

3.3

3.4

3.5

3.6

3.7

3.8

3.9

4.0

4.1

4.2

4.3

4.4

4.5

4.6

4.7

4.8

4.9

5.0

5.1

5.2

5.3

5.4

5.5

5.6

5.7

5.8

5.9

6.0

6.1

6.2

6.3

6.4

6.5

6.6

6.7

6.8

6.9

7.0

7.1

7.2

7.3

7.4

7.5

7.6

7.7

7.8

7.9

8.0

8.1

8.2

8.3

8.4

8.5

8.6

8.7

8.8

8.9

9.0

9.1

9.2

9.3

9.4

9.5

9.6

9.7

9.8

9.9

10.0
